# Supplementary material
Source: PubMed Central journal article supplement (PMC6322456)
Supplement: 4cc6ab785496ef6f5d207f18a8c60631_JCM.01056-18-s0001.pdf [file 4cc6ab785496ef6f5d207f18a8c60631_JCM.01056-18-s0001.pdf]

**Table S1 WHO International Standards for NAT that have been replaced**

| <b>Preparation</b>    | <b>Standard (code number)</b>            | <b>Year of establishment</b> | <b>Material (accession no.)</b>                                                                                                                                                                                                                                                             | <b>Unitage (IU/vial)</b> | <b>Reference</b> |
|-----------------------|------------------------------------------|------------------------------|---------------------------------------------------------------------------------------------------------------------------------------------------------------------------------------------------------------------------------------------------------------------------------------------|--------------------------|------------------|
| Hepatitis A virus RNA | 1 <sup>st</sup> IS (00/560)              | 2003                         | Viremic human plasma, genotype IA diluted in pooled plasma. 00/560 and 00/562 were prepared from the same single donation and the same diluent and lyophilized separately.                                                                                                                  | 50,000                   | 1                |
|                       | 2 <sup>nd</sup> IS (00/562)              | 2013                         |                                                                                                                                                                                                                                                                                             | 27,000                   | 2                |
|                       | 3 <sup>rd</sup> IS (15/276) – current IS | 2017                         | Viremic human plasma, a new genotype IB strain diluted in pooled plasma (KY003229)                                                                                                                                                                                                          | 15,451                   | 3                |
|                       |                                          |                              |                                                                                                                                                                                                                                                                                             |                          |                  |
| Hepatitis B virus DNA | 1 <sup>st</sup> IS (97/746)              | 1999                         | Viremic human plasma - Eurohep R1; genotype A, HBsAg subtype adw2 diluted in pooled plasma. 97/746 were prepared from the same original bulk but lyophilized separately; 10/264 and 10/266 were prepared as separate bulks using the same strain with new pooled plasma diluent (KY003230). | 500,000                  | 4                |
|                       | 2 <sup>nd</sup> IS (97/750)              | 2006                         |                                                                                                                                                                                                                                                                                             | 500,000                  | 5                |
|                       | 3 <sup>rd</sup> IS (10/264)              | 2011                         |                                                                                                                                                                                                                                                                                             | 425,000                  | 6                |
|                       | 4 <sup>th</sup> IS (10/266)-current IS   | 2016                         |                                                                                                                                                                                                                                                                                             | 477,500                  | 7                |
|                       |                                          |                              |                                                                                                                                                                                                                                                                                             |                          |                  |
| Hepatitis C virus RNA | 1 <sup>st</sup> IS (96/790)              | 1997                         | HCV genotype 1a viremic human plasma diluted in pooled human cryosupernatant. 96/790 and 96/798 were prepared from the same original bulk but lyophilized separately                                                                                                                        | 50,000                   | 8                |
|                       | 2 <sup>nd</sup> IS (96/798)              | 2003                         |                                                                                                                                                                                                                                                                                             | 50,000                   | 9                |

| Preparation    | Standard (code number)                   | Year of establishment | Material (accession no.)                                                                                                                                                                       | Unitage (IU/vial) | Reference |
|----------------|------------------------------------------|-----------------------|------------------------------------------------------------------------------------------------------------------------------------------------------------------------------------------------|-------------------|-----------|
|                | 3 <sup>rd</sup> IS (06/100)              | 2007                  | HCV genotype 1a viremic human plasma (distinct from 96/790 and 96/798) diluted in pooled human plasma. 06/100 and 06/102 were prepared from the same original bulk but lyophilized separately. | 77,440            | 10        |
|                | 4 <sup>th</sup> IS (06/102)              | 2011                  |                                                                                                                                                                                                | 130,000           | 11        |
|                | 5 <sup>th</sup> IS (14/150) – current IS | 2015                  | HCV genotype 1a viremic human plasma, distinct from previous standards.                                                                                                                        | 100,000           | 12        |
|                |                                          |                       |                                                                                                                                                                                                |                   |           |
| HIV-1 RNA      | 1 <sup>st</sup> IS (97/656)              | 1999                  | HIV-1 subtype B viremic human plasma diluted in pooled human cryosupernatant.                                                                                                                  | 100,000           | 13        |
|                | 2 <sup>nd</sup> IS (97/650)              | 2006                  | Cultured subtype B isolate diluted in pooled human cryosupernatant (KJ019215) - isolate distinct from 97/656).                                                                                 | 363,078           | 14        |
|                | 3 <sup>rd</sup> IS (10/152)              | 2011                  | Cultured and heat inactivated subtype B isolate (the same strain as 97/650) diluted in human plasma prepared as separate bulks from the same stock.                                            | 185,000           | 15        |
|                | 4 <sup>th</sup> IS (16/194) – current IS | 2017                  |                                                                                                                                                                                                | 125,893           | 16        |
|                |                                          |                       |                                                                                                                                                                                                |                   |           |
| Parvovirus B19 | 1 <sup>st</sup> IS (99/800)              | 2000                  | B19V genotype 1a1 viremic human                                                                                                                                                                | 500,000           | 17        |

| <b>Preparation</b> | <b>Standard (code number)</b>            | <b>Year of establishment</b> | <b>Material (accession no.)</b>                                                                                                     | <b>Unitage (IU/vial)</b> | <b>Reference</b> |
|--------------------|------------------------------------------|------------------------------|-------------------------------------------------------------------------------------------------------------------------------------|--------------------------|------------------|
|                    | 2 <sup>nd</sup> IS (99/802)              | 2008                         | plasma diluted in pooled plasma; 99/800 and 99/802 were prepared from the same original bulk but lyophilized separately (KM065414). | 500,000                  | 18               |
|                    | 3 <sup>rd</sup> IS (12/208) – current IS | 2013                         | B19V genotype 1 viremic human plasma of a new strain diluted in pooled plasma.                                                      | 705,000                  | 19               |

**Table S2 Observed variation in molecular testing in EQA/PT schemes**

| <b>Target Pathogen</b> | <b>IS available (year of establishment)</b> | <b>SD range of geometric mean (log<sub>10</sub>)*</b> | <b>Units of measurement reported by participants</b> |
|------------------------|---------------------------------------------|-------------------------------------------------------|------------------------------------------------------|
| HIV-1                  | Yes (1999)                                  | 0.17 – 0.24                                           | Copies/mL                                            |
| HCV                    | Yes (1997)                                  | 0.20 – 0.32                                           | IU/mL                                                |
| HBV                    | Yes (1999)                                  | 0.30 – 0.45                                           | IU/mL                                                |
| CMV                    | Yes (2010)                                  | 0.30 – 0.53                                           | IU/mL<br>Copies/mL                                   |
| EBV                    | Yes (2011)                                  | 0.46 – 0.63                                           | IU/mL<br>Copies/mL                                   |
| HAV                    | Yes (2003)                                  | >1.0                                                  | Copies/mL                                            |
| BKV                    | Yes (2015)                                  | 0.50 – 0.60                                           | Copies/mL<br>IU/mL                                   |
| JCV                    | Yes (2015)                                  | 0.62 – 0.73                                           | Copies/mL<br>IU/mL                                   |

|                                                         |            |             |                           |
|---------------------------------------------------------|------------|-------------|---------------------------|
| Herpes simplex virus                                    | No         | 0.60 – 0.70 | Copies/mL<br>$C_T$ values |
| Varicella zoster virus                                  | No         | 0.66 – 0.85 | Copies/mL                 |
| HHV6B                                                   | Yes (2016) | 0.50 – 0.80 | Copies/mL                 |
| Human adenovirus**                                      | No         | 0.49 – 0.84 | Copies/mL                 |
| Enterovirus                                             | No         | >1.30       | $C_T$ values              |
| Gastroenteritis (bacterial, viral, parasitic pathogens) | No         | >1.25       | $C_T$ values              |

\*Where IU/mL and copies/mL are provided then the SD relates to the IU/mL only.

\*\*It is anticipated that the 1<sup>st</sup> ISs human adenovirus will be established in 2018.

**Table S3 Standards in development**

| <b>Viral targets</b>                         | <b>Parasitic targets</b> | <b>Bacterial targets</b>          |
|----------------------------------------------|--------------------------|-----------------------------------|
| Crimean Congo hemorrhagic fever*             | <i>Babesia microti</i> * | <i>Mycobacterium tuberculosis</i> |
| Enterovirus (A71, D68, coxsackie A and B)*   | <i>Leishmania spp</i>    |                                   |
| Herpes simplex virus type 1 and type 2       | <i>Plasmodium vivax</i>  |                                   |
| HIV-1 CRF panel extension*                   | <i>Trypanosma cruzi</i>  |                                   |
| Human adenovirus**                           |                          |                                   |
| Human papilloma virus <sup>#</sup>           |                          |                                   |
| Influenza virus (A and B)                    |                          |                                   |
| Lassa virus*                                 |                          |                                   |
| Marburg virus*                               |                          |                                   |
| Middle East respiratory syndrome coronavirus |                          |                                   |
| Nipah virus*                                 |                          |                                   |
| Respiratory syncytial virus                  |                          |                                   |
| Sudan virus*                                 |                          |                                   |
| Varicella zoster virus                       |                          |                                   |

|                 |  |  |
|-----------------|--|--|
| West Nile virus |  |  |
|-----------------|--|--|

\*The proposals for these reference materials are expected to be endorsed by the WHO ECBS in October 2018

[http://www.who.int/biologicals/BS.2018.2342\\_Requests\\_to\\_initiate\\_new\\_WHO\\_reference\\_material\\_projects\\_for\\_biologicals.pdf](http://www.who.int/biologicals/BS.2018.2342_Requests_to_initiate_new_WHO_reference_material_projects_for_biologicals.pdf)

\*\*N.B. It is expected that the human adenovirus standard will be established at the 1<sup>st</sup> IS by the WHO ECBS in October 2018

#Several preparations are being evaluated for HPV (types 6, 11, 31, 33, 45, 52 and 58) and similar to the established standard for HPV 16 and HPV 18 are based on recombinant plasmids (20) diluted in human genomic DNA.

## **Sequence information - International Reference Panels**

### **1<sup>st</sup> International Reference Panel for Hepatitis B Virus genotypes - (5086/08)**

Sequence information (PreS/S region) for the individual panel members available under [https://www.pei.de/SharedDocs/Downloads/EN/who/5086-08-additional-information.pdf?\\_\\_blob=publicationFile&v=1](https://www.pei.de/SharedDocs/Downloads/EN/who/5086-08-additional-information.pdf?__blob=publicationFile&v=1)



**Table S4 2<sup>nd</sup> International Reference Panel for HIV-1 subtypes (12/224)**

| <b>Subtype/group</b> | <b>Strain</b> | <b>Code Number</b> | <b>Accession Number</b>                 |
|----------------------|---------------|--------------------|-----------------------------------------|
| A                    | 92UG037       | 11/150             | U51190                                  |
| B                    | 92TH014       | 11/152             | U86572                                  |
| C                    | 98TZ017       | 11/154             | AF286235                                |
| D                    | 94UG114       | 11/156             | U88824                                  |
| AE                   | 92TH001       | 11/158             | U86565 (near full length)               |
| F                    | 93BR020       | 11/160             | AF005494                                |
| G                    | RU570         | 11/162             | U08368 (partial)                        |
| AG-GH                | VI525         | 11/164             | L11792 + U09665 + AJ277822<br>(partial) |
| N                    | YBF30         | 11/166             | AJ006022                                |
| O                    | MVP5180       | 11/168             | L20571                                  |

**Table S5 1<sup>st</sup> International Reference Panel for HIV-1 circulating recombinant forms (13/214)**

| <b>Subtype/group</b> | <b>Strain</b> | <b>Code Number</b> | <b>Accession Number</b> |
|----------------------|---------------|--------------------|-------------------------|
| Group O              | BCF01         | 11/144             | AY713425                |
| CRF 11 GJ            | MP1307        | 11/148             | AF460972                |
| CRF 02 AG            | P1261         | 11/140             | EU786671                |
| CRF01 AE             | CM244         | 11/102             | AY494 972               |
| CRF01, A, G, J, U    | 96CM1849      | 12/146             | AJ291720                |
| CRF BG 24            | X2456         | 12/144             | FJ670526                |
| Subtype J            | SE9173        | 11/100             | *NA                     |
| Subtype C            | X1936         | 12/142             | EU786673                |
| Subtype G            | P962          | 11/138             | EU786670                |
| CRF ADG              | 24203         | 11/146             | *NA                     |

\*Not available

**Table S6 1<sup>st</sup> International Reference Panel for Hepatitis E Virus RNA Genotypes (8578/13)**

| Genotype   | Strain   | Code Number | Accession Number   |
|------------|----------|-------------|--------------------|
| 1a         |          | 8567/13     | NA*                |
| 1a         | Kol 15   | 8568/13s    | NA*                |
| 1e         |          | 8569/13     | NA*                |
| 3b         | JRC-HE3  | 8570/13     | AB6300971          |
| 3c         | Oct 8    | 8571/13     | JN995569 (partial) |
| 3e         | Oct 3    | 8572/13     | JN995564 (partial) |
| 3f**       | Oct 12   | 8573/13     | JN995573 (partial) |
| 3 (rabbit) |          | 8574/13s    | MG211750           |
| 4c         | HRC-HE15 | 8575/13     | LC387631           |
| 4g         | HRC-HE58 | 8576/13     | LC387631           |
| 2a         | Mex 14   | 8577/13s    | KX578717           |

\*Partial sequence data included in original study report for 1a and 1e

[http://apps.who.int/iris/bitstream/handle/10665/197775/WHO\\_BS\\_2015.2264\\_eng.pdf;jsessionid=31DC19F99562D2722A9B88594D83AF51?sequence=1](http://apps.who.int/iris/bitstream/handle/10665/197775/WHO_BS_2015.2264_eng.pdf;jsessionid=31DC19F99562D2722A9B88594D83AF51?sequence=1), whole genome sequencing of panel has been performed (manuscript in preparation)

\*\*3f – tentatively assigned as 3l using the HEVnet criteria

**Table S7 1<sup>st</sup> International Reference Panel for Parvovirus B19 Genotypes - 09/110; CBER Parvovirus B19 Genotype Panel 1**

| <b>Genotype</b> | <b>Strain</b> | <b>Code Number</b> | <b>Accession Number</b> |
|-----------------|---------------|--------------------|-------------------------|
| 1a1             | NA            | 09/110 member 1    | KM065414                |
| 2               | IM-81         | 09/110 member 22   | AY903437                |
| 3a              | P1            | 09/110 member 3    | FJ265736                |

Panel member 4 – negative plasma

Panel supplied by both NIBSC (code number 09/110) also supplied by CBER/FDA (code number Parvovirus B19 Genotype Panel 1)

### Figure S1 Relative potency analysis

Relative potency of the sample S2 included in the study to establish the 1<sup>st</sup> IS for HEV RNA. White indicates quantitative assays ( $\log_{10}$  copies/mL); gray indicates qualitative assays ( $\log_{10}$  NAT-detectable units/mL). Number of laboratories is indicated on the vertical axis. Laboratory code numbers are indicated in the respective boxes. Reproduced, in modified form, with the permission of *Emerging Infectious Diseases* (21).

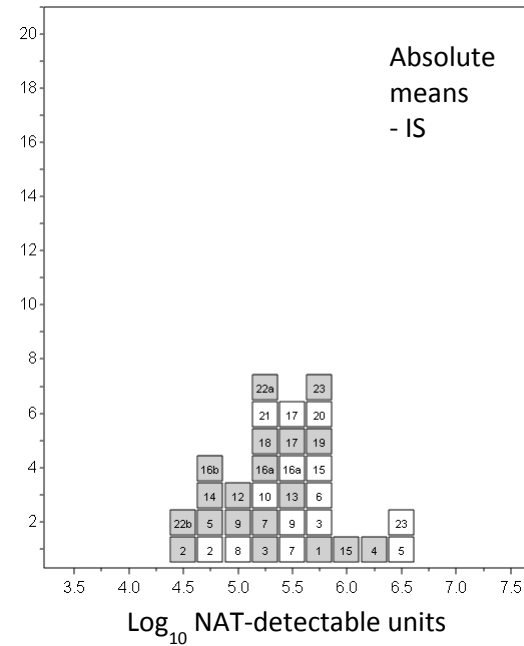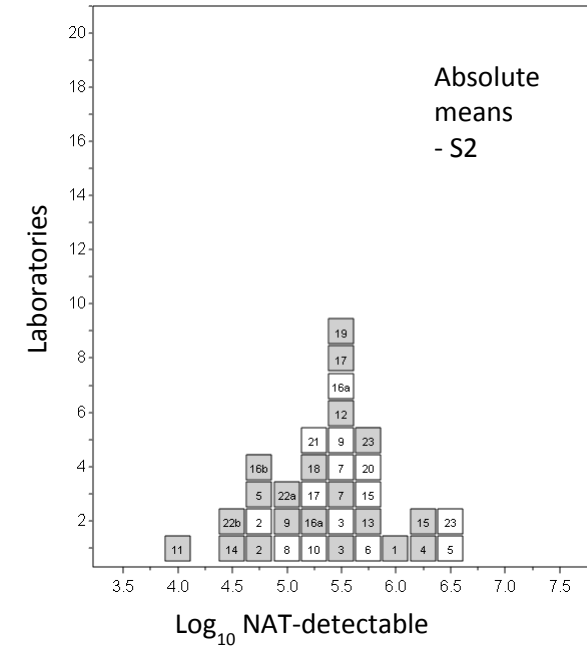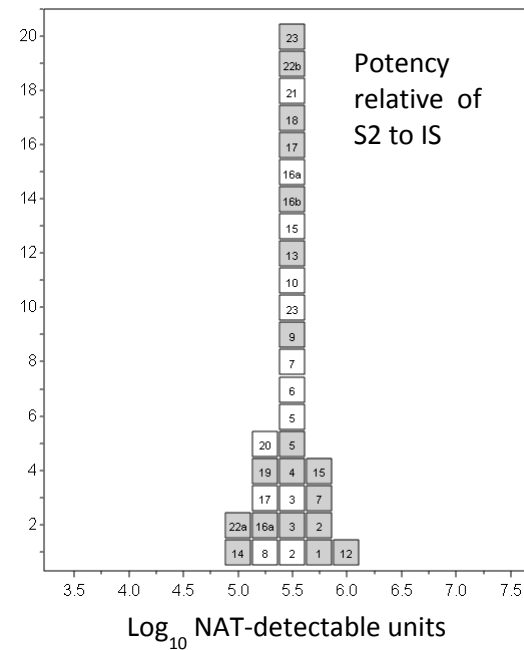

**Figure S2** Change in qualitative versus quantitative reporting for the CMV EQA programme between 2002 and 2018.

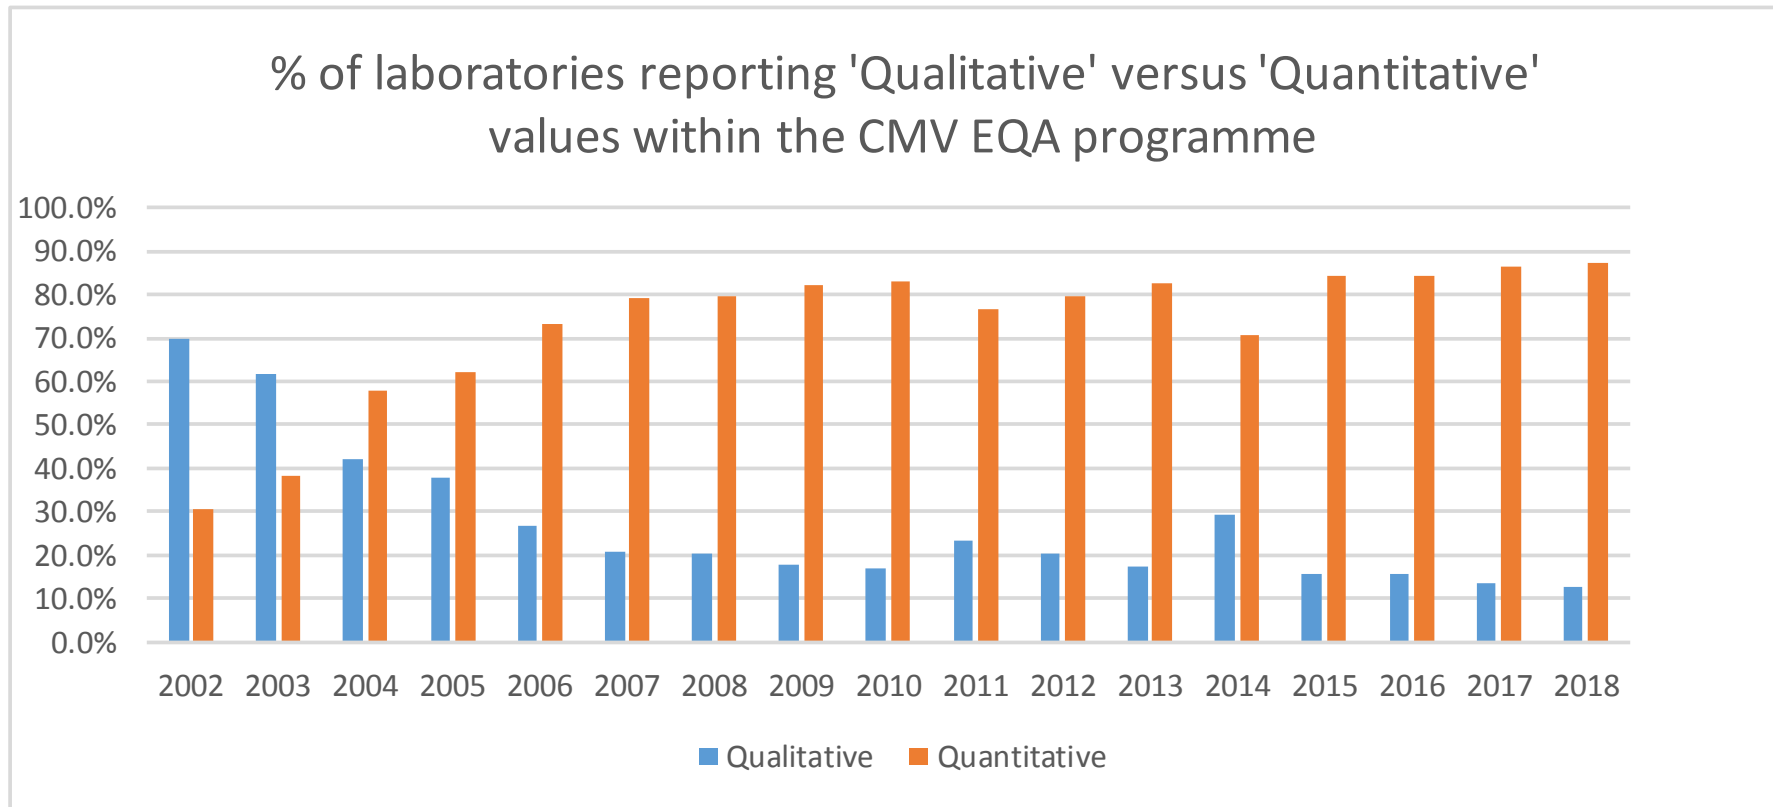

**Figure S3** Increase in reporting in IU/mL versus copies/mL or other units for CMV in the EQA programme between 2002 and 2018.

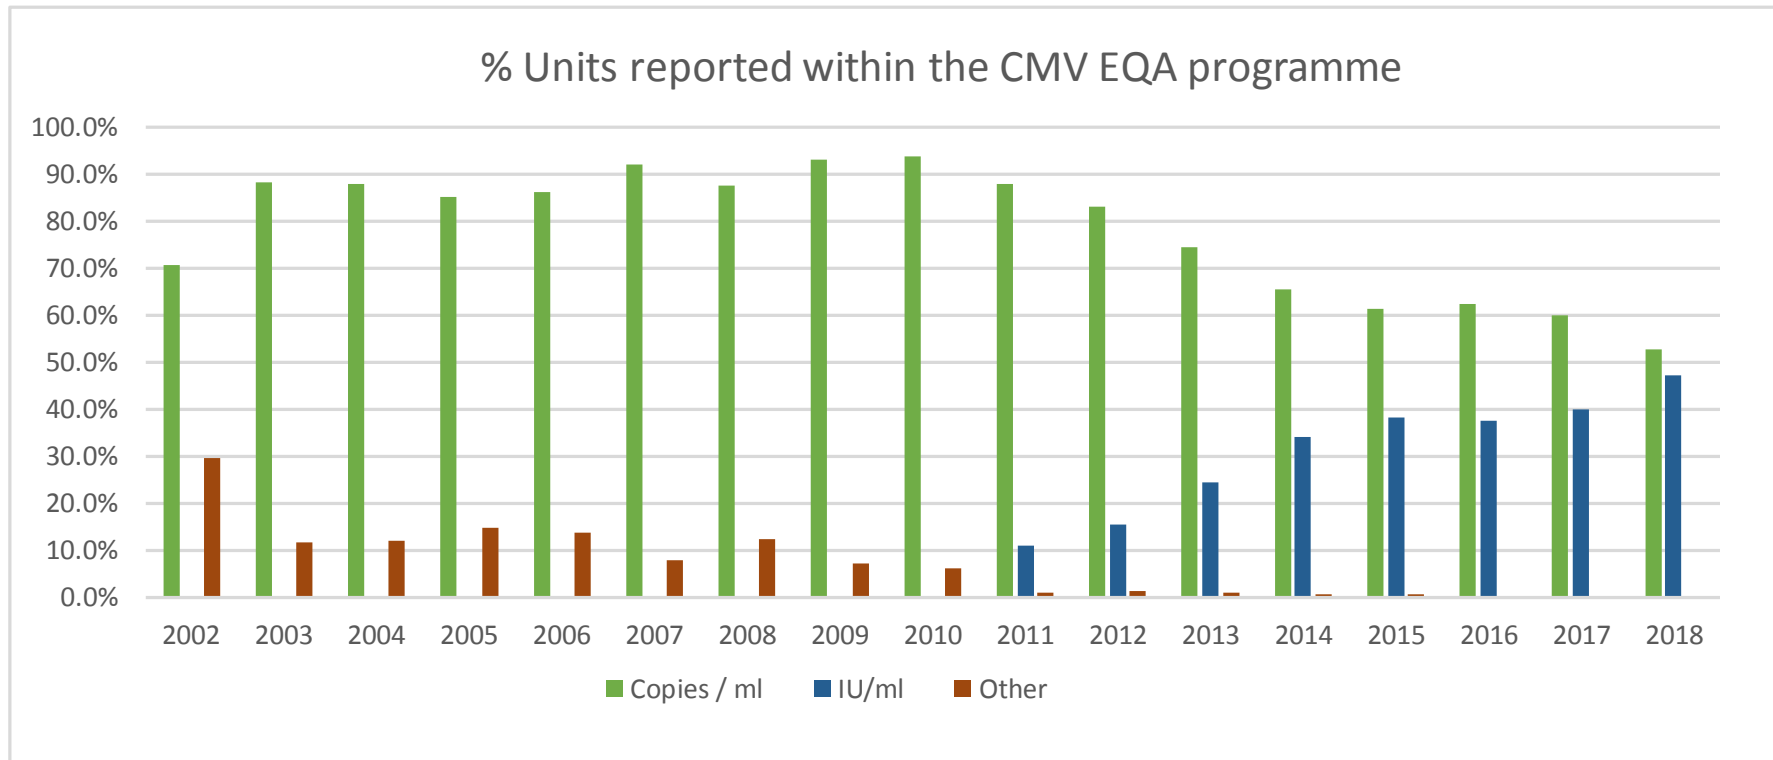

**Figure S4** Increasing use of commercial CMV assays for the CMV EQA programme between 2002 and 2018.

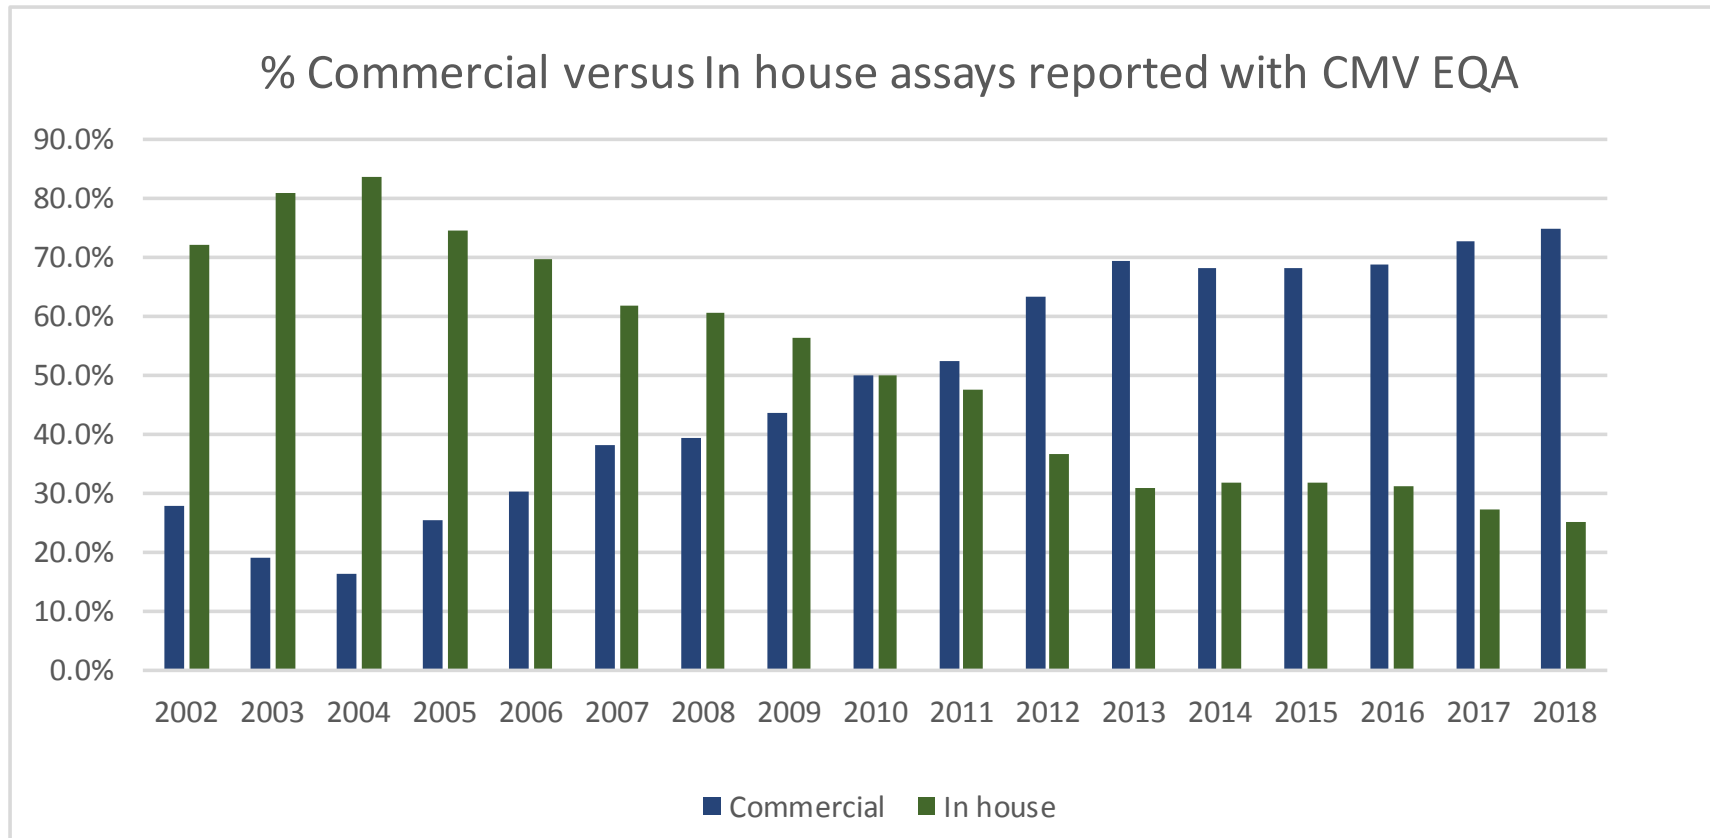



## REFERENCES

1. Saldanha J, Heath A, Lelie N, Pisani G, Yu MY; Collaborative Study Group. 2005. A World Health Organization International Standard for hepatitis A virus RNA nucleic acid amplification technology assays. *Vox Sang* 89:52-58.
2. Fryer JF, Heath AB, Morris CL and the Collaborative Study Group. 2013. Collaborative study to evaluate the proposed 2nd WHO International Standard for hepatitis A virus (HAV) for nucleic acid amplification technology (NAT)-based assays. Report no. WHO/BS/2013.2225. WHO, Geneva, Switzerland.
3. Minhas R, Fryer JF, Hockley J, Morris C. 2017. Collaborative study to evaluate the proposed 3rd WHO International Standard for hepatitis A virus (HAV) for nucleic acid amplification technology (NAT)-based assays. Report no. WHO/BS/2017.2308. WHO, Geneva, Switzerland.
4. Saldanha J, Gerlich W, Lelie N, Dawson P, Heermann K, Heath A; WHO Collaborative Study Group. 2001. An international collaborative study to establish a World Health Organization international standard for hepatitis B virus DNA nucleic acid amplification techniques. *Vox Sang* 80:63-71.
5. Baylis SA, Heath AB, Chudy M, Pisani G, Klotz A, Kerby S, Gerlich W. 2008. An international collaborative study to establish the 2nd World Health Organization International Standard for hepatitis B virus DNA nucleic acid amplification technology-based assays. *Vox Sang* 94:358-362.
6. Fryer JF, Heath AB, Wilkinson DE, Minor PD; Collaborative Study Group. 2017 A collaborative study to establish the 3rd WHO International Standard for hepatitis B virus for nucleic acid amplification techniques. *Biologicals* 46:57-63.

7. Fryer JF, Minhas R, Dougall T, Rigsby P, Clare L. Morris and the Collaborative Study Group. 2016. Collaborative study to evaluate the proposed WHO 4th International Standard for hepatitis B virus (HBV) DNA for nucleic acid amplification technique (NAT) based assays. Report no. WHO/BS/2016.2291. WHO, Geneva, Switzerland.
8. Saldanha J, Lelie N, Heath A. 1999. Establishment of the first international standard for nucleic acid amplification technology (NAT) assays for HCV RNA. WHO Collaborative Study Group. *Vox Sang* 76:149-158.
9. Saldanha J, Heath A, Aberham C, Albrecht J, Gentili G, Gessner M, Pisani G. 2005. World Health Organization collaborative study to establish a replacement WHO international standard for hepatitis C virus RNA nucleic acid amplification technology assays. *Vox Sang* 88:202-204.
10. Baylis SA, Heath AB; Collaborative Study Group. 2011. World Health Organization collaborative study to calibrate the 3rd International Standard for Hepatitis C virus RNA nucleic acid amplification technology (NAT)-based assays. *Vox Sang* 100:409-417.
11. Fryer JF, Heath AB, Wilkinson DE, Minor PD and the Collaborative Study Group. 2011. Collaborative Study to Evaluate the Proposed 4th WHO International Standard for Hepatitis C Virus (HCV) for Nucleic Acid Amplification Technology (NAT)-Based Assays. Report no. WHO/BS/2011.2173. WHO, Geneva, Switzerland.
12. Morris C, Prescott G, Hockley J and the Collaborative Study Group. 2015. Collaborative study to evaluate the proposed 5th WHO International Standard for hepatitis C virus (HCV) RNA for nucleic acid amplification technique (NAT)-based assays. Report no. WHO/BS/2015.2262. WHO, Geneva, Switzerland.
13. Holmes H, Davis C, Heath A, Hewlett I, Lelie N. 2001. An international collaborative study to establish the 1st international standard for HIV-1 RNA for use in nucleic acid-based techniques. *J Virol Methods* 92:141-150.

14. Davis C, Berry N, Heath A, Holmes H. 2008. An international collaborative study to establish a replacement World Health Organization International Standard for human immunodeficiency virus 1 RNA nucleic acid assays. *Vox Sang* 95:218-225.
15. Morris CL, Heath AB. 2011. International collaborative study to establish the 3rd WHO International Standard for HIV-1 NAT assays. Report no. WHO/BS/2011.2178. WHO, Geneva, Switzerland.
16. Prescott G, Hockley J, Atkinson E, Rigsby P, Morris C. 2017. International collaborative study to establish the 4th WHO International Standard for HIV-1 NAT assays. Report no. WHO/BS/2017.2314. WHO, Geneva, Switzerland.
17. Saldanha J, Lelie N, Yu MW, Heath A; B19 Collaborative Study Group. 2002 Establishment of the first World Health Organization International Standard for human parvovirus B19 DNA nucleic acid amplification techniques. *Vox Sang* 82:24-31.
18. Baylis SA, Chudy M, Blümel J, Pisani G, Candotti D, José M, Heath AB. 2010. Collaborative study to establish a replacement World Health Organization International Standard for parvovirus B19 DNA nucleic acid amplification technology (NAT)-based assays. *Vox Sang* 98:441-446.
19. Fryer JF, Heath AB, Morris CL. 2013. Collaborative study to evaluate the proposed 3rd WHO International Standard for parvovirus B19 (B19V) for nucleic acid amplification technology (NAT)-based assays. Report no. WHO/BS/2013.2224. WHO, Geneva, Switzerland.
20. Wilkinson DE, Baylis SA, Padley D, Heath AB, Ferguson M, Pagliusi SR, Quint WG, Wheeler CM; Collaborative Study Group. 2010. Establishment of the 1st World Health Organization international standards for human papillomavirus type 16 DNA and type 18 DNA. *Int J Cancer* 126:2969-2983.
21. Baylis SA, Blümel J, Mizusawa S, Matsubayashi K, Sakata H, Okada Y, Nübling CM, Hanschmann KM; HEV Collaborative Study Group. 2013. World Health Organization International Standard to harmonize assays for detection of hepatitis E virus RNA. *Emerg Infect Dis* 19:729-735.
